# Supplementary material
Source: PubMed Central journal article supplement (PMC5833648)
Supplement: jamaoncol-4-7-s002.pdf [file jamaoncol-4-7-s002.pdf]

## Supplementary Online Content

Iyengar P, Wardak Z, Gerber DE, et al. Consolidative radiotherapy for limited metastatic non–small-cell lung cancer: a phase 2 randomized clinical trial. *JAMA Oncol*. Published online September 24, 2017. doi:10.1001/jamaoncol.2017.3501

**eTable 1.** Analysis of Factors Predicting Benefit for Consolidation

**eTable 2.** Comprehensive Toxicity Assessment

**eTable 3.** Analysis of Factors Predicting Benefit for Consolidation

This supplementary material has been provided by the authors to give readers additional information about their work.

Supplemental Table 1) Additional Patient Treatment Details

Supplemental Table 2) Comprehensive Toxicity Assessment

Supplemental Table 3) Analysis of Factors Predicting Benefit for Consolidation

|  |                               | SABR + Maintenance |       | Maintenance Only            |       |  |
|--|-------------------------------|--------------------|-------|-----------------------------|-------|--|
|  |                               | No.                | %     | No.                         | %     |  |
|  | Initial Chemotherapy Regimen  |                    |       |                             |       |  |
|  | Carboplatin-Pemetrexed        | 5                  | 35.7% | 9                           | 60.0% |  |
|  | Carboplatin-Paclitaxel        | 4                  | 28.6% | 3                           | 20.0% |  |
|  | Carboplatin-Gemcitabine       | 0                  | 0.0%  | 1                           | 6.7%  |  |
|  | Carboplatin-Taxol-Bevacizumab | 3                  | 21.4% | 1                           | 6.7%  |  |
|  | Carboplatin-Etoposide         | 1                  | 7.1%  | 1                           | 6.7%  |  |
|  | Cisplatin-Etoposide           | 1                  | 7.1%  | 0                           | 0.0%  |  |
|  | Initial Brain Treatment       |                    |       |                             |       |  |
|  | SRS                           | 1                  | 7.1%  | 1                           | 6.7%  |  |
|  | WBRT                          | 4                  | 28.6% | 3                           | 20.0% |  |
|  | Resection                     | 1                  | 7.1%  | 1*                          | 6.7%  |  |
|  | No involvement                | 8                  | 57.1% | 10                          | 66.7% |  |
|  |                               |                    |       | * resection followed by SRS |       |  |

**Supplemental Table 1)** Initial treatment details for all patients included. The most common chemotherapy was carboplatin and pemetrexed for both arms. Of note, one patient with a resected brain metastasis was treated with post-operative stereotactic radiosurgery (SRS).

|  |                  | SABR + Maintenance |   |   |   |   | Maintenance Alone |   |   |   |   |  |
|--|------------------|--------------------|---|---|---|---|-------------------|---|---|---|---|--|
|  |                  | 1                  | 2 | 3 | 4 | 5 | 1                 | 2 | 3 | 4 | 5 |  |
|  | CNS              |                    |   |   |   |   |                   |   |   |   |   |  |
|  | Gastrointestinal | 6                  |   |   |   |   | 6                 |   |   |   |   |  |
|  | Hematologic      |                    | 4 | 1 |   |   | 3                 | 3 | 1 | 1 |   |  |
|  | Infectious       |                    |   | 1 |   |   |                   |   | 1 |   |   |  |
|  | Metabolic        |                    |   |   |   |   |                   |   |   |   |   |  |
|  | Renal            |                    |   |   |   |   |                   |   |   |   |   |  |
|  | Respiratory      | 2                  |   | 2 |   |   | 2                 | 1 |   |   |   |  |
|  | Skin             | 1                  |   |   |   |   |                   |   |   |   |   |  |
|  | NOS              | 4                  | 1 |   |   | 3 | 6                 | 1 |   |   | 6 |  |
|  | Total            | 13                 | 5 | 4 | 0 | 3 | 17                | 5 | 2 | 1 | 6 |  |
|  |                  |                    |   |   |   |   |                   |   |   |   |   |  |

**Supplemental Table 2)** A comprehensive list of toxicities by treatment arm and CTCAE 4.0 grade. No grade 3 or higher toxicity was attributable to SABR. While there were several grade 5 events none were attributable to study interventions.

|  | Characteristic             |                   | 1 Yr PFS    | p    | 1 Yr OS     | p    |
|--|----------------------------|-------------------|-------------|------|-------------|------|
|  | Brain Metastases           | absent vs present | 43% vs 30%  | 0.78 | 75% vs 60%  | 0.26 |
|  | # sites prior chemotherapy | ≤2 vs >2          | 100% vs 38% | 0.09 | 100% vs 57% | 0.31 |
|  | # sites post chemotherapy  | ≤2 vs >2          | 51% vs 25%  | 0.78 | 67% vs 67%  | 0.27 |
|  |                            |                   |             |      |             |      |

**Supplemental Table 3)** A statistical evaluation of whether patients with brain metastases or number of lesions present prior or post chemotherapy had better or worse survival with consolidative radiotherapy to metastases and primary disease.
